# Supplementary material
Source: PubMed Central journal article supplement (PMC5473062)

# Emergence of CD43-Expressing Hematopoietic Progenitors from Human Induced Pluripotent Stem Cells

Katharina U. Kessel<sup>a</sup> Anika Bluemke<sup>a</sup> Hans R. Schöler<sup>a, b</sup>  
Holm Zaehres<sup>a, c</sup> Peter Schlenke<sup>d</sup> Isabel Dorn<sup>d</sup>

<sup>a</sup>Department of Cell and Developmental Biology, Max Planck Institute for Molecular Biomedicine, Münster, Germany; <sup>b</sup>Medical Faculty, Westphalian Wilhelms University Münster, Münster, Germany; <sup>c</sup>Department of Anatomy and Molecular Embryology, Medical Faculty, Ruhr-University Bochum, Bochum, Germany; <sup>d</sup>Medical University Graz; Department for Blood Group Serology and Transfusion Medicine, Graz, Austria

## Supplemental Material

**Supplementary fig. 1.** Correlation of global gene expression profiles of hiPSC-derived hematopoietic progenitors and HSCs. Global gene expression data from hESC and hiPSC-derived d21 EB cells as well as sorted CD43<sup>hi</sup> cells were obtained from microarray data analysis (C) and compared to PB (A) and CB-HSCs (B). Correlation was determined by Pearson coefficient. Expression of HSC-specific markers was additionally obtained through microarray data analysis.

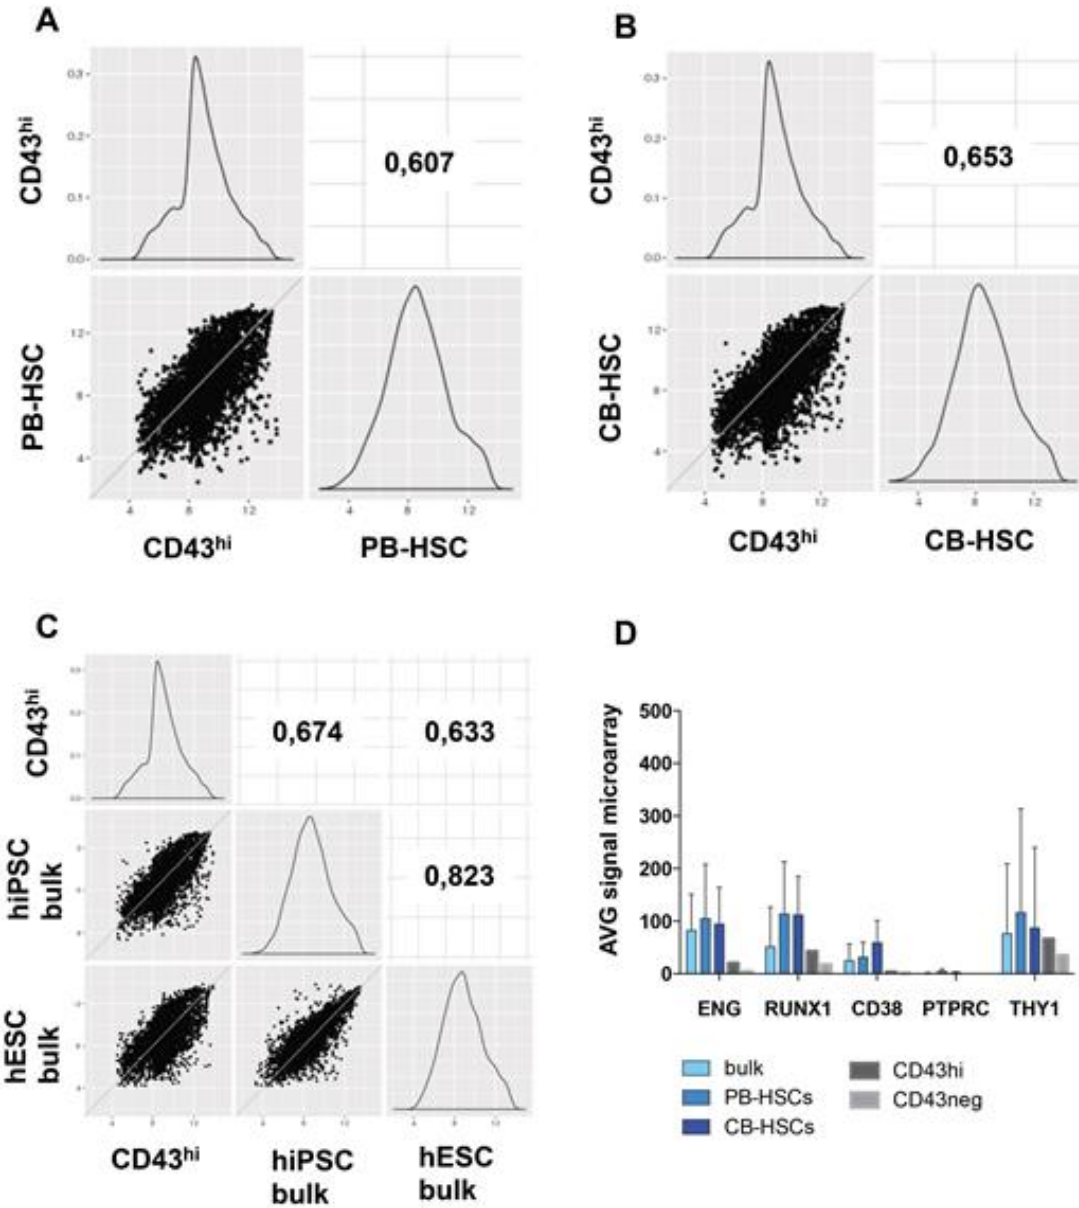

Supplement: tmh-0044-0143-s01.pdf [file tmh-0044-0143-s01.pdf]
